1 **An intranasal lentiviral booster broadens immune recognition of SARS-CoV-2 variants and**  
2 **reinforces the waning mRNA vaccine-induced immunity that it targets to lung mucosa**

3

4 Running title: Boosting mRNA-induced SARS-CoV-2 immunity with a lentiviral-based nasal  
5 vaccine

6

7 Benjamin Vesin<sup>1,£</sup>, Jodie Lopez<sup>1,£</sup>, Amandine Noirat<sup>1,£</sup>, Pierre Authié<sup>1,£</sup>, Ingrid Fert<sup>1</sup>, Fabien Le  
8 Chevalier<sup>1</sup>, Fanny Moncoq<sup>1</sup>, Kirill Nemirov<sup>1</sup>, Catherine Blanc<sup>1</sup>, Cyril Planchais<sup>2</sup>, Hugo Mouquet<sup>2</sup>,  
9 Françoise Guinet<sup>3</sup>, David Hardy<sup>4</sup>, Christiane Gerke<sup>5</sup>, François Anna<sup>1</sup>, Maryline Bourguin<sup>1</sup>, Laleh  
10 Majlessi<sup>1,§,\*</sup>, ✉, and Pierre Charneau<sup>1,§,\*</sup>

11

12 <sup>1</sup> Institut Pasteur-TheraVectys Joint Lab, Virology Department, 28 rue du Dr. Roux, Paris F-  
13 75015, France

14 <sup>2</sup> Laboratory of Humoral Immunology, Université de Paris, Immunology Department, Institut  
15 Pasteur, INSERM U1222, Paris F-75015, France

16 <sup>3</sup> Lymphocytes and Immunity Unit, Université de Paris, Immunology Department, Institut  
17 Pasteur, Paris F-75015, France

18 <sup>4</sup> Histopathology platform, Institut Pasteur, Paris F-75015, France

19 <sup>5</sup> Institut Pasteur, Université de Paris, Innovation Office, Vaccine Programs, Institut Pasteur,  
20 Paris F-75015, France

21

22

23 <sup>£</sup>These authors contributed equally

24 <sup>§</sup>Senior authors

25 ✉ Corresponding author: [laleh.majlessi@pasteur.fr](mailto:laleh.majlessi@pasteur.fr)

26

27 **Keywords**

28 Intranasal Vaccination / Lentiviral Vaccine / SARS-CoV-2 Emerging Variants of Concern /  
29 Mucosal Immunity / Mucosal Booster Vaccine / Waning anti-COVID-19 Immunity

30        **Abstract**

31        As the COVID-19 pandemic continues and new SARS-CoV-2 variants of concern emerge, the  
32        adaptive immunity initially induced by the first-generation COVID-19 vaccines wains and needs to  
33        be strengthened and broadened in specificity. Vaccination by the nasal route induces mucosal  
34        humoral and cellular immunity at the entry point of SARS-CoV-2 into the host organism and has  
35        been shown to be the most effective for reducing viral transmission. The lentiviral vaccination  
36        vector (LV) is particularly suitable for this route of immunization because it is non-cytopathic, non-  
37        replicative and scarcely inflammatory. Here, to set up an optimized cross-protective intranasal  
38        booster against COVID-19, we generated an LV encoding stabilized Spike of SARS-CoV-2 Beta  
39        variant (LV::S<sub>Beta-2P</sub>). mRNA vaccine-primed and -boosted mice, with waning primary humoral  
40        immunity at 4 months post-vaccination, were boosted intranasally with LV::S<sub>Beta-2P</sub>. Strong boost  
41        effect was detected on cross-sero-neutralizing activity and systemic T-cell immunity. In addition,  
42        mucosal anti-Spike IgG and IgA, lung resident B cells, and effector memory and resident T cells  
43        were efficiently induced, correlating with complete pulmonary protection against the SARS-CoV-2  
44        Delta variant, demonstrating the suitability of the LV::S<sub>Beta-2P</sub> vaccine candidate as an intranasal  
45        booster against COVID-19.

## 46 **Introduction**

47 Considering: (i) the sustained pandemicity of coronavirus disease 2019 (COVID-19), (ii)  
48 weakening protection potential of the first-generation vaccines against Severe Acute Respiratory  
49 Syndrome beta-coronavirus 2 (SARS-CoV-2), and (iii) ceaseless emergence of new viral Variants  
50 of Concerns (VOCs), new effective vaccine platforms can be critical for the future primary or  
51 booster vaccines [1]. We recently demonstrated the strong performance of a non-integrative  
52 lentiviral vaccination vector (LV) encoding the full-length sequence of Spike glycoprotein (S) from  
53 the ancestral SARS-CoV-2 (LV::S), when used in systemic prime followed by intranasal (i.n.) boost  
54 in multiple preclinical models [2]. LV::S ensures complete (cross) protection of the respiratory tract  
55 against ancestral SARS-CoV-2 and VOCs [3]. In addition, in our new transgenic mice expressing  
56 human Angiotensin Converting Enzyme 2 (hACE2) and displaying unprecedented permissiveness  
57 of the brain to SARS-CoV-2 replication, an i.n. boost with LV::S is required for full protection of  
58 the central nervous system [3]. LV::S is intended to be used as a booster for individuals who  
59 previously been vaccinated against and/or infected by SARS-CoV-2 to reinforce and broaden  
60 protection against emerging VOCs with immune evasion potential [4].

61 Vaccine LVs are non-integrating, non-replicative, non-cytopathic and negligibly inflammatory  
62 [5,6]. These vectors are pseudotyped with the heterologous glycoprotein from Vesicular Stomatitis  
63 Virus (VSV-G) which confers them a broad tropism for diverse cell types, including dendritic cells.  
64 The latter are mainly non-dividing cells and thus barely permissive to gene transfer. Hence, LVs  
65 possess the central property to efficiently transfer genes to the nuclei of not only dividing but also  
66 non-dividing cells, which therefore renders possible efficient transduction of non-dividing immature  
67 dendritic cells. The resulting endogenous antigen expression in these cells, with unique ability of  
68 dendritic cells to activate naïve T cells [7], correlate with a strong ability of LVs at inducing high-  
69 quality effector and memory T cells [8]. Importantly, VSV-G pseudo-typing also avoids LVs to be  
70 targets of preexisting vector-specific immunity in humans which is key in vaccine development  
71 [5,6]. The safety of LV has been established in humans in a phase I/IIa Human Immunodeficiency  
72 Virus-1 therapeutic vaccine trial, even though if an integrative version of LV had been used in that  
73 clinical trial [9]. Because of their non-cytopathic and non-inflammatory properties [10,11], LVs are  
74 well suitable for mucosal vaccination. The i.n. immunization approach is expected to trigger  
75 mucosal IgA responses, as well as resident B and T lymphocytes in the respiratory tract [12]. This  
76 immunization route has also been shown to be the most effective at reducing SARS-CoV-2  
77 transmission in both hamster and macaque preclinical models [13]. Induction of mucosal immunity  
78 by i.n. immunization allows SARS-CoV-2 neutralization, directly at the gateway to the host  
79 organism, before it gains access to major infectable anatomical sites [2].

80 The duration of the protection conferred by the first generation COVID-19 vaccines is not yet  
81 well established, hardly predictable with serological laboratory tests and variable in diverse  
82 individuals and against distinct VOCs. Despite high vaccination rates, the current exacerbation of  
83 the world-wide pandemic indicates that repeated booster immunizations will be needed to ensure  
84 individual and collective immunity against COVID-19. In this context, the safety and potential  
85 adverse effects of multiple additional homologous doses of the first generation COVID-19 vaccines,  
86 for instance related to allergic reaction to polyethylene glycol (PEG) contained in mRNA vaccines,  
87 have to be taken into the account [14]. Importantly, an unmatched vaccine delivery method, i.e.,  
88 heterologous prime-boost format, has been proven to be a more successful strategy than  
89 homologous prime-boost approach in numerous preclinical models of various infectious diseases  
90 [15-17]. Therefore, new efficient vaccination platforms are of particular interest to develop  
91 heterologous boosters against COVID-19. The LV::S vaccine candidate has potential for  
92 prophylactic use against COVID-19, mainly based on its strong capacity to induce not only strong  
93 neutralizing humoral responses, but also and most importantly, robust protective T-cell responses  
94 which preserve their immune detection of spike from SARS-CoV-2 VOCs, despite the  
95 accumulation of escape mutations [3]. LV::S is remarkably suitable to be used, as a heterologous  
96 i.n. booster vaccine, to reinforce and broaden protection against the emerging VOCs, while  
97 collective immunity in early vaccinated nations is waning a few months after completion of the  
98 initial immunization, and while new waves of infections are on the rise [4].

99 In the present study, toward the preparation of a clinical trial, we first generated an LV encoding  
100 the down-selected S<sub>CoV-2</sub> of the Beta variant, stabilized by K<sup>986</sup>P and V<sup>987</sup>P substitutions in the S2  
101 domain of S<sub>CoV-2</sub> (LV::S<sub>Beta-2P</sub>). In mice, primed and boosted intramuscularly (i.m.) with mRNA  
102 vaccine encoding for the ancestral S<sub>CoV-2</sub> [18,19], and in which the (cross) sero-neutralization  
103 potential was progressively decreasing, we investigated the systemic and mucosal immune  
104 responses and the protective potential of an i.n. LV::S<sub>Beta-2P</sub> heterologous boost.

## 105 **Results**

### 106 **Antigen design and down-selection of a lead candidate**

107 To select the most suitable  $S_{\text{CoV-2}}$  variant to induce the greatest neutralization breadth based on  
108 the known variants, we generated LVs encoding the full length  $S_{\text{CoV-2}}$  from the Alpha, Beta or  
109 Gamma SARS-CoV-2 VOCs. C57BL/6 mice ( $n = 5/\text{group}$ ) were primed i.m. (wk 0) and boosted  
110 i.m. (wk 3) with  $1 \times 10^8$  TU/mouse of each individual LV and the (cross) neutralization potential  
111 of their sera was assessed before boost (wk 3) and after boost (wk 5) against pseudoviruses  
112 carrying various  $S_{\text{CoV-2}}$  (**Figure 1A**). Immunization with LV:: $S_{\text{Alpha}}$  generated appropriate  
113 neutralization capacity against  $S_{\text{D614G}}$  and  $S_{\text{Alpha}}$  but not against  $S_{\text{Beta}}$  and  $S_{\text{Gamma}}$  (**Figure 1B**).  
114 Between LV:: $S_{\text{Beta}}$  and LV:: $S_{\text{Gamma}}$ , the former generated the highest cross sero-neutralization  
115 potential against  $S_{\text{D614G}}$ ,  $S_{\text{Alpha}}$  and  $S_{\text{Gamma}}$  variants. In accordance with previous observations using  
116 other vaccination strategies, in the context of immunization with LV, the  $K^{986}\text{P} - V^{987}\text{P}$   
117 substitutions in the S2 domain of  $S_{\text{CoV-2}}$  improved the (cross) sero-neutralization potential (**Figure**  
118 **1C**), probably due to an extended half-life of  $S_{\text{CoV-2-2P}}$  [20].

119 Taken together these data allowed to down select  $S_{\text{Beta-2P}}$  as the best cross-reactive antigen  
120 candidate to be used in the context of LV (LV:: $S_{\text{Beta-2P}}$ ) to strengthen the waning immunity  
121 previously induced by the first generation COVID-19 vaccines, like mRNA.

122

### 123 **Follow-up of humoral immunity in mRNA-primed and -boosted mice and effect of** 124 **LV:: $S_{\text{Beta-2P}}$ i.n. boost**

125 We analyzed the potential of LV:: $S_{\text{Beta-2P}}$  i.n. boost vaccination to strengthen and broaden the  
126 immune responses in mice which were initially primed and boosted with mRNA and in which the  
127 (cross) sero-neutralization potential was decreasing. C57BL/6 mice were primed i.m. at wk 0 and  
128 boosted i.m. at wk 3 with  $1 \mu\text{g}/\text{mouse}$  of mRNA (**Figure 2A**). In mRNA-primed mice, serum anti-  
129  $S_{\text{CoV-2}}$  and anti-RBD IgG were detected at wk 3, increased after mRNA boost as studied at wk 6  
130 and 10, and then decreased at wk 17 in the absence of an additional boost (**Figure S1A**).

131 Longitudinal serological follow-up demonstrated that at 3 wks post prime, cross-neutralization  
132 activities against both  $S_{\text{D614G}}$  and  $S_{\text{Alpha}}$  were readily detectable (**Figure 2B**). Cross sero-  
133 neutralization was also detectable, although to a lesser degree, against  $S_{\text{Gamma}}$ , but not against  
134  $S_{\text{Beta}}$ ,  $S_{\text{Delta}}$  or  $S_{\text{Delta+}}$ . At wk 6, i.e., 3 wks post boost, cross sero-neutralization activities against all  
135  $S_{\text{CoV-2}}$  variants were detectable, although at significantly lesser extents against  $S_{\text{Beta}}$ ,  $S_{\text{Delta}}$  and  
136  $S_{\text{Delta+}}$ . From wk 6 to wk 10, cross sero-neutralization against  $S_{\text{Beta}}$ ,  $S_{\text{Delta}}$ , or  $S_{\text{Delta+}}$  gradually and

137 significantly decreased. At wk 10, half of the mice lost the cross sero-neutralization potential  
138 against  $S_{\text{Beta}}$ ,  $S_{\text{Delta}}$ , or  $S_{\text{Delta+}}$  (**Figure 2B**).

139 At wk 15, groups of mRNA-primed and -boosted mice received i.n. escalating doses of  $1 \times 10^6$ ,  
140  $1 \times 10^7$ ,  $1 \times 10^8$ , or  $1 \times 10^9$  Transduction Units (TU)/mouse of LV:: $S_{\text{Beta-2P}}$  (**Figure 2A**). Control  
141 mRNA-primed and -boosted mice received i.n.  $1 \times 10^9$  TU of an empty LV (LV Ctrl). In parallel,  
142 at this time point, mRNA-primed and -boosted mice were injected i.m. with 1  $\mu\text{g}$  of mRNA-  
143 vaccine or PBS. The dose of 1  $\mu\text{g}$  of mRNA per mouse has been demonstrated to be fully  
144 protective in mice [21]. Unprimed, age-matched mice received i.n.  $1 \times 10^9$  TU of LV:: $S_{\text{Beta-2P}}$  or  
145 PBS.

146 In the previously mRNA-primed and -boosted mice, injected at wk 15 with  $1 \times 10^8$  or  $1 \times 10^9$   
147 TU of LV:: $S_{\text{Beta-2P}}$  or a third dose of mRNA, marked anti- $S_{\text{CoV-2}}$  IgG titer increases were observed  
148 (**Figure 2C**). The titers of anti- $S_{\text{CoV-2}}$  IgA were higher in the mice injected with  $1 \times 10^9$  TU of  
149 LV:: $S_{\text{Beta-2P}}$  than those injected with a third 1  $\mu\text{g}$  dose of mRNA vaccine (**Figure 2C**). At the  
150 mucosal level, at this time point, titers of anti- $S_{\text{CoV-2}}$  and anti-RBD IgG in the total lung extracts  
151 increased in a dose-dependent manner in LV:: $S_{\text{Beta-2P}}$ -boosted mice, and the titer obtained with the  
152 highest dose of LV:: $S_{\text{Beta-2P}}$  was comparable to that after the third 1  $\mu\text{g}$  i.m. dose of mRNA  
153 vaccine (**Figure S1B**). Importantly, significant titers of lung anti- $S_{\text{CoV-2}}$  IgA were only detected in  
154 LV:: $S_{\text{Beta-2P}}$ -boosted mice (**Figure S1B**).

155 At the lung cellular level, CD19<sup>+</sup> B cells which are class-switched and thus surface IgM/IgD<sup>-</sup>  
156 plasma cells, and which express CD38, CD62L, CD73 and CD80, can be defined as lung resident  
157 B cells (Brm) [22,23] (**Figure 3A**). The proportion of these B cells increased in a dose-dependent  
158 manner in the lungs of mice boosted i.n. with LV:: $S_{\text{Beta-2P}}$  (**Figure 3B**). Mucosal anti- $S_{\text{CoV-2}}$  IgA  
159 and Brm were barely detectable in the mice boosted i.m. at wk15 with 1  $\mu\text{g}$  of mRNA, which was  
160 the single dose of RNA tested in our experiment and thus serves only as indication.

161

### 162 **Systemic and mucosal T-cell immunity after i.n. LV:: $S_{\text{Beta-2P}}$ boost in previously mRNA-** 163 **primed and -boosted mice**

164 Mice were primed and boosted with 1  $\mu\text{g}$  mRNA-vaccine and then boosted i.n. at wk15 with  
165 escalating doses of LV:: $S_{\text{Beta-2P}}$ , according to the above-mentioned regimen (**Figure 2A**). At wk  
166 17, i.e., two wks after the late boost, systemic anti- $S_{\text{CoV-2}}$  T-cell immunity was assessed by IFN- $\gamma$ -  
167 specific ELISPOT in the spleen of individual mice after in vitro stimulation with individual S:256-  
168 275, S:536-550 or S:576-590 peptide, encompassing immunodominant  $S_{\text{CoV-2}}$  regions for CD8<sup>+</sup> T  
169 cells in H-2<sup>b</sup> mice [2]. Importantly, the weak anti-S CD8<sup>+</sup> T-cell immunity, detectable in the

170 spleen of mRNA-primed-boosted mice at wk 17, largely increased following i.n. boost with  $1 \times$   
171  $10^8$  and  $1 \times 10^9$  TU of LV::S<sub>Beta-2P</sub>, similarly to the increase after i.m. mRNA boost (**Figure 4**).

172 In parallel, in the same animals, the mucosal anti-S<sub>CoV-2</sub> T-cell immunity was assessed by  
173 intracellular Tc1 and Tc2 cytokine staining in T cell-enriched fraction from individual mice after  
174 in vitro stimulation with autologous bone-marrow-dendritic cells loaded with a pool of S:256-275,  
175 S:536-550 and S:576-590 peptides (**Figure 5**). In previously mRNA-primed and -boosted mice,  
176 only a few S<sub>CoV-2</sub>-specific IFN- $\gamma$ /TNF/IL-2 CD8<sup>+</sup> T-cell responses were detected in the lungs  
177 (**Figure 5**). The i.n. administration of LV::S<sub>Beta-2P</sub> boosted, in a dose dependent manner, these Tc1  
178 responses. Sizable percentages of these Tc1 cells were induced with  $1 \times 10^8$  or  $1 \times 10^9$  TU of  
179 LV::S<sub>Beta-2P</sub>. mRNA (1  $\mu$ g) i.m. administration had a substantially lower boost effect on mucosal T  
180 cells (**Figure 5**). Tc2 responses (IL-4, IL-5, IL-10 and IL-13) were not detected in any  
181 experimental group (**Figure S2**), as assessed in the same lung T-cell cultures.

182 Mucosal lung resident memory T cells (Trm), CD8<sup>+</sup> CD44<sup>+</sup> CD69<sup>+</sup> CD103<sup>+</sup> which are one of  
183 the best correlates of protection in the infectious diseases [24], were readily detected in the mice  
184 boosted i.n. with  $1 \times 10^8$  or  $1 \times 10^9$  TU of LV::S<sub>Beta-2P</sub> (**Figure 6A, B**). No Trm were detected in  
185 the lungs of mice boosted late with 1  $\mu$ g mRNA i.m..

#### 186 **Features of lungs after LV::S<sub>Beta-2P</sub> i.n. administration**

187 To identify the immune cell subsets transduced in vivo by LV after i.n. administration,  
188 C57BL/6 mice were immunized i.n. with the high dose of  $1 \times 10^9$  TU of LV::GFP or LV::nano-  
189 Luciferase (LV::nLuc) as a negative control. Lungs were collected at 4 days post-immunization  
190 and analyzed by cytometry in individual mice. CD45<sup>-</sup> cell subset was devoid of GFP<sup>+</sup> cells. Only a  
191 very few GFP<sup>+</sup> cells were detected in the CD45<sup>+</sup> hematopoietic cells (**Figure S3A-C**). The CD45<sup>+</sup>  
192 GFP<sup>+</sup> cells were located in a CD11b<sup>hi</sup> subset and in the CD11b<sup>int</sup> CD11c<sup>+</sup> CD103<sup>+</sup> MHC-II<sup>+</sup>  
193 (dendritic cells) (**Figure S3B**).

194 To evaluate possible lung infiltration after LV i.n. administration, C57BL/6 mice were injected  
195 i.n. with the high dose of  $1 \times 10^9$  TU of LV::S<sub>Beta-2P</sub> or PBS as a negative control. Lungs were  
196 collected at 1, 3 or 14 days post-injection for histopathological analysis. H&E histological  
197 sections displayed minimal to moderate inflammation, interstitial and alveolar syndromes in both  
198 experimental groups, regardless of the three time points investigated. No specific immune  
199 infiltration or syndrome was detected in the animals treated i.n. with  $1 \times 10^9$  TU of LV::S<sub>Beta-2P</sub>,  
200 compared to PBS (**Figure S4A, B**).

201 **Protection of lungs in mRNA-primed and -boosted mice, and later boosted i.n. with**  
202 **LV::S<sub>Beta-2P</sub>**

203 We then evaluated the protective vaccine efficacy of LV::S<sub>Beta-2P</sub> i.n. in mRNA-primed and -  
204 boosted mice. At wk 15, mRNA-primed and -boosted mice received i.n.  $1 \times 10^8$  TU of LV::S<sub>Beta-2P</sub>  
205 or control empty LV. (Figure 7A). The choice of this dose was based on our previous experience  
206 with this dose which was effective in protection in homologous LV::S prime-boost regimens [2,3].  
207 Control mRNA-immunized mice received i.m. 1 µg of mRNA or PBS. Unvaccinated, age-and sex-  
208 matched controls were left unimmunized. Five weeks after the late boost, i.e. at wk 20, all mice  
209 were pre-treated with  $3 \times 10^8$  Infectious Genome Units (IGU) of an adenoviral vector serotype 5  
210 encoding hACE2 (Ad5::hACE2) [2] to render their lungs permissive to SARS-CoV-2 replication  
211 (Figure 7A). Four days later, mice were challenged with SARS-CoV-2 Delta variant, which at the  
212 time of this study, i.e. November 2021, was the dominant SARS-CoV-2 variant worldwide.

213 At day 3 post infection, primary analysis of the total lung RNA showed that hACE2 mRNA was  
214 similarly expressed in all mice after Ad5::hACE2 *in vivo* transduction (Figure 7B). Lung viral  
215 loads were then determined at 3 dpi by assessing total E RNA and sub-genomic (Esg) E<sub>CoV-2</sub> RNA  
216 qRT-PCR, the latter being an indicator of active viral replication [25-27]. In mice initially primed  
217 and boosted with mRNA-vaccine and then injected i.n. with the control LV or i.m. with PBS, no  
218 significant protective capacity was detectable (Figure 7C). In contrast, the LV::S<sub>Beta-2P</sub> i.n. boost of  
219 the initially mRNA vaccinated mice drastically reduced the total E RNA content of SARS-CoV-2  
220 and no copies of the replication-related Esg E<sub>CoV-2</sub> RNA were detected in this group (Figure 7C). In  
221 the group which received a late mRNA i.m. boost, the total E RNA content was also significantly  
222 reduced and the content of Esg E<sub>CoV-2</sub> RNA was undetectable in 3 out of 5 in this group.

223 Therefore, a late LV::S<sub>Beta-2P</sub> heterologous i.n. boost, given at wk 15 after the first injection of  
224 mRNA, at the dose of  $1 \times 10^8$  TU/mouse resulted in complete protection, i.e. total absence of viral  
225 replication in 100% of animals, against a high dose challenge with SARS-CoV-2 Delta variant.



## 226 **Discussion**

227 With the weakly persistent prophylactic potential of the immunity initially induced by the first-  
228 generation COVID-19 vaccines, especially against new VOCs, administration of additional vaccine  
229 doses becomes essential [1]. As an alternative to additional doses of the same vaccines, combining  
230 vaccine platforms in a heterologous prime-boost regimen holds promise for gaining protective  
231 efficacy [28]. Compared to homologous vaccine dose administrations, heterologous prime-boost  
232 strategies may reinforce more efficiently specific adaptive immune responses and long-term  
233 protection [29]. Furthermore, the sequence of the Spike antigen has to be adapted according to the  
234 dynamics of SARS-CoV-2 VOC emergence in order to induce the greatest neutralization breadth.  
235 Protection against symptomatic SARS-CoV-2 infection is mainly related to sero-neutralizing  
236 activity, while CD8<sup>+</sup> T-cell immunity, with their ability to cytolysis virus-infected cells, especially  
237 control the virus replication and result in resolution of viral infection [30]. Therefore, an appropriate  
238 B- and T-cell vaccine platform, including an adapted S<sub>CoV2</sub> sequence, is of utmost interest at the  
239 current step of the pandemic.

240 The LV-based strategy, which is highly efficient, not only in inducing humoral responses but  
241 also, and particularly, in establishing high quality and memory T-cell responses [8], is a favorable  
242 platform for a heterologous boost, even if it is also largely efficacious by its own as a primary  
243 COVID-19 vaccine candidate [2,3]. Furthermore, LV is non-cytopathic, non-replicative and  
244 scarcely inflammatory and thus can be used to perform non-invasive i.n. boost to efficiently induce  
245 sterilizing mucosal immunity, which protects the respiratory system as well as the central nervous  
246 system [2,3]. The i.n. route of vaccination has been shown by several teams to be the most  
247 efficacious route at reducing viral contents in nasal swabs and nasal olfactory neuroepithelium  
248 [31,32], which can contribute to block the respiratory chain of SARS-CoV-2 transmission. One of  
249 the advantages of LV-based immunization is the induction of strong T-cell immune responses with  
250 high cross-reactivity of T-cell epitopes from Spike of diverse VOCs. Therefore, when the  
251 neutralizing antibody fails or wanes, the T-cell arm remains largely protective, as we recently  
252 described in antibody-deficient, B-cell compromised  $\mu$ MT KO mice [3]. This property is relative to  
253 a high-quality and long-lasting T-cell immunity induced against multiple preserved T-cell epitopes,  
254 despite the mutations accumulated in the Spike of the emerging VOCs [3], including the Omicron  
255 variant.

256 In the present study, we down-selected the S<sub>Beta-2P</sub> antigen which induced the greatest  
257 neutralization breadth against the main SARS-CoV-2 VOCs and designed a non-integrative LV  
258 encoding a stabilized version of this antigen. In mice primed and boosted with mRNA vaccine  
259 (encoding the ancestral S<sub>CoV-2</sub> sequence), with waning (cross) sero-neutralization capacity, we used

260 escalating doses of LV::S<sub>Beta-2P</sub> for an i.n. late boost. We demonstrated a dose-dependent increase in  
261 anti-S<sub>CoV-2</sub> IgG and IgA titers, and a broadened sero-neutralization potential both in the sera and  
262 lung homogenates against VOCs. No anti-S<sub>CoV-2</sub> IgA was detected in the lungs of mice injected with  
263 the third dose of 1 µg of mRNA given via i.m.. Increasing proportions of non-circulating Brm,  
264 defined as class-switched surface IgM/IgD<sup>-</sup> plasma cells, with CD38<sup>+</sup> CD73<sup>+</sup> CD62L<sup>+</sup> CD69<sup>+</sup>  
265 CD80<sup>+</sup> phenotype [22,23], were detected in a dose-dependent manner, in the lungs of mice boosted  
266 i.n. with LV::S<sub>Beta-2P</sub>.

267 Spike-specific, effector lung CD8<sup>+</sup> Tc1 cells were largely detected in the initially mRNA-  
268 primed and boosted mice which received a late i.n. LV::S<sub>Beta-2P</sub> boost. These lung CD8<sup>+</sup> T cells did  
269 not display Tc2 phenotype. Increasing proportions of lung CD8<sup>+</sup> CD44<sup>+</sup> CD69<sup>+</sup> CD103<sup>+</sup> Trm were  
270 also detected, in a dose-dependent manner, only in LV::S<sub>Beta-2P</sub> i.n. boosted mice. The systemic  
271 CD8<sup>+</sup> T-cell responses against various immunogenic regions of S<sub>CoV-2</sub> were also increased with 1  
272 × 10<sup>8</sup> or 1 × 10<sup>9</sup> TU doses of LV::S<sub>Beta-2P</sub> i.n. boost in the initially mRNA-primed and -boosted  
273 mice. The highest i.n. dose of LV::S<sub>Beta-2P</sub> was comparable to the third injection of 1 µg/mouse  
274 of mRNA given by i.m.. The fact that the i.n. administration of LV::S<sub>Beta-2P</sub> had a substantial boost  
275 effect on the systemic T-cell immunity indicates that this boost pathway is not at the expense of  
276 the induction of systemic immunity. Evaluation of the protection in mRNA-primed and -boosted  
277 mice, showed that 20 wk after the first injection of mRNA vaccine, there was no protection  
278 detectable in the lungs against infection with the SARS-CoV-2 Delta variant. Importantly, an i.n.  
279 boost at wk 15 with the dose of 1 × 10<sup>8</sup> TU/mouse LV::S<sub>Beta-2P</sub> resulted in full inhibition of SARS-  
280 CoV-2 replication in the lungs upon challenge with the Delta variant at wk 20. In the mice  
281 receiving an 1 µg mRNA i.m. boost at wk 15 the lung SARS-CoV-2 RNA contents was reduced  
282 in a statistically comparable manner, albeit without total inhibition of viral replication in all mice.

283 The lack of protection against the Delta variant infection only four months after the initial  
284 systemic prime-boost by mRNA vaccine, as we observed in the preclinical model in this study, may  
285 be explained by the weak efficiency of the ancestral S<sub>CoV-2</sub> sequence to induce long-lasting  
286 neutralizing antibodies against the recent VOCs. In addition, it can be hypothesized that the  
287 adaptive immune memory induced by i.m. mRNA immunization is likely to be localized in  
288 secondary lymphoid organs at anatomical sites located far from the upper respiratory tract. In such a  
289 context, the extraordinary rapid replication of new VOCs, such as Delta or Omicron, in the upper  
290 respiratory tract would not leave enough time for the reactivation of immune memory from remote  
291 anatomical sites and the recruitment of the immune arsenal from these sites. In human populations,  
292 such scenario would lead to a high possibility of viral replication and variable levels of its

293 transmission, which would prevent the epidemic from being completely contained by mass  
294 vaccination through the systemic route.

295 It is not yet known if a single third booster will extend and maintain the protective potential, or  
296 whether semi-regular boosters will be required against COVID-19 in the future. The LV::S<sub>Beta-2P</sub> i.n.  
297 boost strengthens the intensity, broadens the VOC cross-recognition, and targets B- and T-cell  
298 immune responses to the principal entry point of SARS-CoV-2 to the mucosal respiratory tract of  
299 the host organism and avoid the infection of main anatomical sites. It is interesting to note that in  
300 rodents only a pair of cervical ganglia exists versus a large network of such ganglia in humans [33].  
301 Following i.n. immunization, this anatomical feature in humans may provide even a more consistent  
302 site of immune response induction and local memory maintenance, at the vicinity of to the potential  
303 site of airway infection. In addition, nasopharynx-associated lymphoid tissue is a powerful defense  
304 system composed of: (i) organized lymphoid tissue, i.e., tonsils, and (ii) a diffuse nose-associated  
305 lymphoid tissues, where effector and memory B and T lymphocytes are able to maintain long-  
306 lasting immunity [34]. This mucosal immune arsenal deserves to be explored in the control of  
307 SARS-CoV-2 transmission in the current context of the pandemic. A phase I clinical trial is  
308 currently in preparation for the use of i.n. boost by LV::S<sub>Beta-2P</sub> in previously vaccinated humans or  
309 in COVID-19 convalescents.

## 310 **Materials and Methods**

### 311 **Mice immunization and SARS-CoV-2 infection**

312 Female C57BL/6JRj mice were purchased from Janvier (Le Genest Saint Isle, France), housed in  
313 individually-ventilated cages under specific pathogen-free conditions at the Institut Pasteur animal  
314 facilities and used at the age of 7 wks. Mice were immunized i.m. with 1 µg/mouse of mRNA-1273  
315 (Moderna) vaccine. For i.n. injections with LV, mice were anesthetized by i.p. injection of  
316 Ketamine (Imalgene, 80 mg/kg) and Xylazine (Rompun, 5 mg/kg). For protection experiments  
317 against SARS-CoV-2, mice were transferred into filtered cages in isolator. Four days before SARS-  
318 CoV-2 inoculation, mice were pretreated with  $3 \times 10^8$  IGU of Ad5::hACE2 as previously described  
319 [2]. Mice were then transferred into a level 3 biosafety cabinet and inoculated i.n. with  $0.3 \times 10^5$   
320 TCID<sub>50</sub> of the Delta variant of SARS-CoV-2 clinical isolate [35] contained in 20 µl. Mice were then  
321 housed in filtered cages in an isolator in BioSafety Level 3 animal facilities. The organs recovered  
322 from the infected animals were manipulated according to the approved standard procedures of these  
323 facilities.

### 324 **Ethical approval of animal experimentation**

325 Experimentation on animals was performed in accordance with the European and French  
326 guidelines (Directive 86/609/CEE and Decree 87-848 of 19 October 1987) subsequent to approval  
327 by the Institut Pasteur Safety, Animal Care and Use Committee, protocol agreement delivered by  
328 local ethical committee (CETEA #DAP20007, CETEA #DAP200058) and Ministry of High  
329 Education and Research APAFIS#24627-2020031117362508 v1, APAFIS#28755-  
330 2020122110238379 v1.

### 331 **Construction and production of vaccinal LV::S<sub>Beta-2P</sub>**

332 First, a codon-optimized sequence of Spike from the Ancestral, D614G, Alpha, Beta or Gamma  
333 VOCs were synthesized and inserted into the pMK-RQ\_S-2019-nCoV\_S501YV2 plasmid. The S  
334 sequence was then extracted by BamHI/XhoI digestion to be ligated into the pFlap lentiviral  
335 plasmid between the BamHI and XhoI restriction sites, located between the native human ieCMV  
336 promoter and the mutated *atg* starting codon of Woodchuck Posttranscriptional Regulatory Element  
337 (WPRE) sequence (**Figure S5**). To introduce the K<sup>986</sup>P-V<sup>987</sup>P “2P” double mutation in S<sub>D614G</sub> or  
338 S<sub>Beta</sub>, a directed mutagenesis was performed by use of Takara In-Fusion kit on the corresponding  
339 pFlap plasmids. Various pFlap-ieCMV-S-WPREm or pFlap-ieCMV-S<sub>2P</sub>-WPREm plasmids were  
340 amplified and used to produce non-integrative vaccinal LV, as described elsewhere [2,6].

### 341 **Analysis of humoral and systemic T-cell immunity**

342 Anti-S<sub>CoV-2</sub> IgG and IgA antibody titers were determined by ELISA by use of recombinant  
343 stabilized S<sub>CoV-2</sub> or RBD fragment for coating. Neutralization potential of clarified and  
344 decompemented sera or lung homogenates was quantitated by use of lentiviral particles pseudo-  
345 typed with S<sub>CoV-2</sub> from diverse variants, as previously described [2,36].

346 T-splenocyte responses were quantitated by IFN- $\gamma$  ELISPOT after in vitro stimulation with  
347 S:256-275, S:536-550 or S:576-590 synthetic 15-mer peptides which contain S<sub>CoV-2</sub> MHC-I-  
348 restricted epitopes in H-2<sup>d</sup> mice [2]. Spots were quantified in a CTL Immunospot S6 ultimate-V  
349 Analyser by use of CTL Immunocapture 7.0.8.1 program.

### 350 **Phenotypic and Functional cytometric analysis of lung immune cells**

351 Enrichment and staining of lung immune cells were performed as detailed elsewhere [2,3] after  
352 treatment with 400 U/ml type IV collagenase and DNase I (Roche) for a 30-minute incubation at  
353 37°C and homogenization by use of GentleMacs (Miltenyi Biotech). Cell suspensions were then  
354 filtered through 100  $\mu$ m-pore filters, centrifuged at 1200 rpm and enriched on Ficoll gradient after  
355 20 min centrifugation at 3000 rpm at RT, without brakes. The recovered cells were co-cultured with  
356 syngeneic bone-marrow derived dendritic cells loaded with a pool of A, B, C peptides, each at 1  
357  $\mu$ g/ml or negative control peptide at x  $\mu$ g/ml. The following mixture was used to detect lung Tc1  
358 cells: PerCP-Cy5.5-anti-CD3 (45-0031-82, eBioScience), eF450-anti-CD4 (48-0042-82,  
359 eBioScience) and APC-anti-CD8 (17-0081-82, eBioScience) for surface staining and BV650-anti-  
360 IFN-g (563854, BD), FITC-anti-TNF (554418, BD) and PE-anti-IL-2 (561061, BD) for  
361 intracellular staining. The following mixture was used to detect lung Tc2 cells: PerCP-Cy5.5-anti-  
362 CD3 (45-0031-82, eBioScience), eF450-anti-CD4 (48-0042-82, eBioScience), BV711-anti-CD8  
363 (563046, BD Biosciences), for surface staining and BV605-anti-IL-4 (504125, BioLegend Europe BV),  
364 APC-anti-IL-5 (504306, BioLegend Europe BV), FITC-anti-IL-10 (505006, BioLegend Europe BV), PE-  
365 anti-IL-13 (12-7133-81, eBioScience) for intracellular staining. The intracellular staining was  
366 performed by use of the Fix Perm kit (BD), following the manufacturer's protocol. Dead cells were  
367 excluded by use of Near IR Live/Dead (Invitrogen). Staining was performed in the presence of  
368 Fc $\gamma$ II/III receptor blocking anti-CD16/CD32 (BD).

369 To identify lung resident memory CD8<sup>+</sup> T-cell subsets, a mixture of PerCP-Vio700-anti-CD3  
370 (130-119-656, Miltenyi Biotec), PECy7-CD4 (552775, BD Biosciences), BV510-anti-CD8  
371 (100752, BioLegend), PE-anti-CD62L (553151, BD Biosciences), APC-anti-CD69 (560689, BD  
372 Biosciences), APC-Cy7-anti-CD44 (560568, BD Biosciences), FITC-anti-CD103 (11-1031-82,  
373 eBiosciences) and yellow Live/Dead (Invitrogen) was used. Lung Brm were studied by surface  
374 staining with a mixture of PerCP Vio700-anti-IgM (130-106-012, Miltenyi), and PerCP Vio700-  
375 anti-IgD (130-103-797, Miltenyi), APC-H7-anti-CD19 (560143, BD Biosciences), PE-anti-CD38

376 (102708, BioLegend Europe BV), PE-Cy7-anti-CD62L (ab25569, AbCam), BV711-anti-CD69  
377 (740664, BD Biosciences), BV421-anti-CD73 (127217, BioLegend Europe BV), FITC-anti-CD80  
378 (104705, BioLegend Europe BV and yellow Live/Dead (Invitrogen).

379 Cells were incubated with appropriate mixtures for 25 minutes at 4°C, washed in PBS containing  
380 3% FCS and fixed with Paraformaldehyde 4% after an overnight incubation at 4°C. Samples were  
381 acquired in an Attune NxT cytometer (Invitrogen) and data analyzed by FlowJo software (Treestar,  
382 OR, USA).

### 383 **Determination of viral RNA content in the organs**

384 Organs from mice were removed and immediately frozen at -80°C on dry ice. RNA from  
385 circulating SARS-CoV-2 was prepared from lungs as described elsewhere [2]. Lung homogenates  
386 were prepared by thawing and homogenizing in lysing matrix M (MP Biomedical) with 500 µl of  
387 PBS using a MP Biomedical Fastprep 24 Tissue Homogenizer. RNA was extracted from the  
388 supernatants of organe homogenates centrifuged during 10 min at 2000g, using the Qiagen Rneasy  
389 kit, except that the neutralization step with AVL buffer/carrier RNA was omitted. The RNA  
390 samples were then used to determine viral RNA content by E-specific qRT-PCR. To determine viral  
391 RNA content by Esg-specific qRT-PCR, total RNA was prepared using lysing matrix D (MP  
392 Biomedical) containing 1 mL of TRIzol reagent (ThermoFisher) and homogenization at 30 s at 6.0  
393 m/s twice using MP Biomedical Fastprep 24 Tissue Homogenizer. The quality of RNA samples  
394 was assessed by use of a Bioanalyzer 2100 (Agilent Technologies). Viral RNA contents were  
395 quantitated using a NanoDrop Spectrophotometer (Thermo Scientific NanoDrop). The RNA  
396 Integrity Number (RIN) was 7.5-10.0. SARS-CoV-2 E or E sub-genomic mRNA were quantitated  
397 following reverse transcription and real-time quantitative TaqMan® PCR, using SuperScript™ III  
398 Platinum One-Step qRT-PCR System (Invitrogen) and specific primers and probe (Eurofins), as  
399 recently described [3].

### 400 **Lung histology**

401 Left lobes from lungs were fixed in formalin and embedded in paraffin. Paraffin sections (5-µm  
402 thick) were stained with Hematoxylin and Eosin (H&E). Slides were scanned using the AxioScan  
403 Z1 (Zeiss) system and images were analyzed with the Zen 2.6 software. Histological images were  
404 evaluated according to a score of 0 to 5 (normal, minimal, mild, moderate, marked, severe).

405

- 407 1. [https://cdn.who.int/media/docs/default-source/immunization/sage/covid/global-covid-19-vaccination-strategic-vision-for-2022\\_sage-yellow-book.pdf?sfvrsn=4827ec0d\\_5](https://cdn.who.int/media/docs/default-source/immunization/sage/covid/global-covid-19-vaccination-strategic-vision-for-2022_sage-yellow-book.pdf?sfvrsn=4827ec0d_5). (2021).
- 408 2. Ku MW, Bourguine M, Authie P *et al*. Intranasal vaccination with a lentiviral vector protects against SARS-CoV-2 in preclinical animal models. *Cell Host Microbe*, 29(2), 236-249 e236 (2021).
- 409 3. Ku MW, Authie P, Bourguine M *et al*. Brain cross-protection against SARS-CoV-2 variants by a lentiviral vaccine in new transgenic mice. *EMBO Mol Med*, e14459 (2021).
- 410 4. Juno JA, Wheatley AK. Boosting immunity to COVID-19 vaccines. *Nat Med*, 27(11), 1874-1875 (2021).
- 411 5. Hu B, Tai A, Wang P. Immunization delivered by lentiviral vectors for cancer and infectious diseases. *Immunol Rev*, 239(1), 45-61 (2011).
- 412 6. Ku MW, Charneau P, Majlessi L. Use of lentiviral vectors in vaccination. *Expert Rev Vaccines*, 1-16 (2021).
- 413 7. Guernonprez P, Gerber-Ferder Y, Vaivode K, Bourdely P, Helft J. Origin and development of classical dendritic cells. *Int Rev Cell Mol Biol*, 349, 1-54 (2019).
- 414 8. Ku MW, Authie P, Nevo F *et al*. Lentiviral vector induces high-quality memory T cells via dendritic cells transduction. *Commun Biol*, 4(1), 713 (2021).
- 415 9. TheraVectys-Clinical-Trial. Safety, Tolerability and Immunogenicity Induced by the THV01 Treatment in Patients Infected With HIV-1 Clade B and Treated With Highly Active Antiretroviral Therapy (HAART). <https://www.clinicaltrialsregister.eu/ctr-search/search?query=2011-006260-52>, 2011-006260-52 (2019).
- 416 10. Cousin C, Oberkampf M, Felix T *et al*. Persistence of Integrase-Deficient Lentiviral Vectors Correlates with the Induction of STING-Independent CD8(+) T Cell Responses. *Cell Rep*, 26(5), 1242-1257 e1247 (2019).
- 417 11. Lopez J, Anna F, Authié P *et al*. An optimized lentiviral vector induces CD4+ T-cell immunity and predicts a booster vaccine against tuberculosis. *Submitted*.
- 418 12. Lund FE, Randall TD. Scent of a vaccine. *Science*, 373(6553), 397-399 (2021).
- 419 13. van Doremalen N, Purushotham JN, Schulz JE *et al*. Intranasal ChAdOx1 nCoV-19/AZD1222 vaccination reduces viral shedding after SARS-CoV-2 D614G challenge in preclinical models. *Sci Transl Med*, 13(607) (2021).
- 420 14. Castells MC, Phillips EJ. Maintaining Safety with SARS-CoV-2 Vaccines. *N Engl J Med*, 384(7), 643-649 (2021).
- 421 15. He Q, Mao Q, An C *et al*. Heterologous prime-boost: breaking the protective immune response bottleneck of COVID-19 vaccine candidates. *Emerg Microbes Infect*, 10(1), 629-637 (2021).
- 422 16. Lu S. Heterologous prime-boost vaccination. *Curr Opin Immunol*, 21(3), 346-351 (2009).
- 423 17. Nordstrom P, Ballin M, Nordstrom A. Effectiveness of heterologous ChAdOx1 nCoV-19 and mRNA prime-boost vaccination against symptomatic Covid-19 infection in Sweden: A nationwide cohort study. *Lancet Reg Health Eur*, 100249 (2021).
- 424 18. Jackson LA, Anderson EJ, Roupheal NG *et al*. An mRNA Vaccine against SARS-CoV-2 - Preliminary Report. *N Engl J Med*, 383(20), 1920-1931 (2020).
- 425 19. Wang F, Kream RM, Stefano GB. An Evidence Based Perspective on mRNA-SARS-CoV-2 Vaccine Development. *Med Sci Monit*, 26, e924700 (2020).
- 426 20. Walls AC, Park YJ, Tortorici MA, Wall A, McGuire AT, Veesler D. Structure, Function, and Antigenicity of the SARS-CoV-2 Spike Glycoprotein. *Cell*, 181(2), 281-292 e286 (2020).
- 427 21. Corbett KS, Edwards DK, Leist SR *et al*. SARS-CoV-2 mRNA vaccine design enabled by prototype pathogen preparedness. *Nature*, 586(7830), 567-571 (2020).
- 428 22. Barker KA, Etesami NS, Shenoy AT *et al*. Lung-resident memory B cells protect against bacterial pneumonia. *J Clin Invest*, 131(11) (2021).
- 429 23. Onodera T, Takahashi Y, Yokoi Y *et al*. Memory B cells in the lung participate in protective humoral immune responses to pulmonary influenza virus reinfection. *Proc Natl Acad Sci U S A*, 109(7), 2485-2490 (2012).
- 430 24. Masopust D, Soerens AG. Tissue-Resident T Cells and Other Resident Leukocytes. *Annu Rev Immunol*, 37, 521-546 (2019).
- 431 25. Chandrashekar A, Liu J, Martinot AJ *et al*. SARS-CoV-2 infection protects against rechallenge in rhesus macaques. *Science*, 369(6505), 812-817 (2020).
- 432 26. Tostanoski LH, Wegmann F, Martinot AJ *et al*. Ad26 vaccine protects against SARS-CoV-2 severe clinical disease in hamsters. *Nat Med*, 26(11), 1694-1700 (2020).
- 433 27. Wolfel R, Corman VM, Guggemos W *et al*. Virological assessment of hospitalized patients with COVID-2019. *Nature*, 581(7809), 465-469 (2020).
- 434 28. Barros-Martins J, Hammerschmidt SI, Cossmann A *et al*. Immune responses against SARS-CoV-2 variants after heterologous and homologous ChAdOx1 nCoV-19/BNT162b2 vaccination. *Nat Med*, 27(9), 1525-1529 (2021).
- 435 29. Kardani K, Bolhassani A, Shahbazi S. Prime-boost vaccine strategy against viral infections: Mechanisms and benefits. *Vaccine*, 34(4), 413-423 (2016).
- 436 30. Sette A, Crotty S. Adaptive immunity to SARS-CoV-2 and COVID-19. *Cell*, 184(4), 861-880 (2021).

- 466 31. Bricker TL, Darling TL, Hassan AO *et al.* A single intranasal or intramuscular immunization with chimpanzee  
467 adenovirus-vectored SARS-CoV-2 vaccine protects against pneumonia in hamsters. *Cell Rep*, 36(3), 109400  
468 (2021).
- 469 32. Hassan AO, Feldmann F, Zhao H *et al.* A single intranasal dose of chimpanzee adenovirus-vectored vaccine  
470 protects against SARS-CoV-2 infection in rhesus macaques. *Cell Rep Med*, 2(4), 100230 (2021).
- 471 33. [https://teachmeanatomy.info/neck/vessels/lymphatics/.](https://teachmeanatomy.info/neck/vessels/lymphatics/)
- 472 34. Porzia A, Cavaliere C, Begvarfaj E, Masieri S, Mainiero F. Human nasal immune system: a special site for  
473 immune response establishment. *J Biol Regul Homeost Agents*, 32(1 Suppl. 1), 3-8 (2018).
- 474 35. Planas D, Veyer D, Baidaliuk A *et al.* Reduced sensitivity of SARS-CoV-2 variant Delta to antibody  
475 neutralization. *Nature*, 596(7871), 276-280 (2021).
- 476 36. Sterlin D, Mathian A, Miyara M *et al.* IgA dominates the early neutralizing antibody response to SARS-CoV-  
477 2. *Sci Transl Med*, 13(577) (2021).
- 478
- 479



480        **Acknowledgments**

481        The authors are grateful to Dr. Marie José Quentin-Millet and Estelle Besson (TheraVectys) for  
482        precious discussion and advices, and to Magali Tichit et Sabine Maurin for excellent technical  
483        assistance in preparing histological sections. The SARS-CoV2 variant Delta/2021/I7.2 200 was  
484        supplied by the Virus and Immunity Unit (Institut Pasteur, Paris, France) headed by Olivier  
485        Schwartz.

486        This work was supported by TheraVectys and Institut Pasteur.

487        **Author Contributions**

488        Study concept and design: BV, JL, CG, MB, LM, PC, acquisition of data: BV, JL, AN, PA, IF,  
489        FLC, FM, KN, MB, LM, construction and production of LV and technical support: AN, FM, CB,  
490        FA, histology: FG, DH, recombinant Spike protein: CP, HM, analysis and interpretation of data:  
491        BV, JL, FA, MB, LM, PC, drafting of the manuscript: LM.

492        **Conflict of Interests**

493        PC is the founder and CSO of TheraVectys. BV, AN, PA, IF, FLC, FM, KN and FA are  
494        employees of TheraVectys. LM has a consultancy activity for TheraVectys. Other authors declare  
495        no competing interests. PA, IF, JL, BV, FA, MB, LM and PC are inventors of pending patents  
496        directed to the potential of i.n. LV::S vaccination against SARS-CoV-2.

**Figure 1**

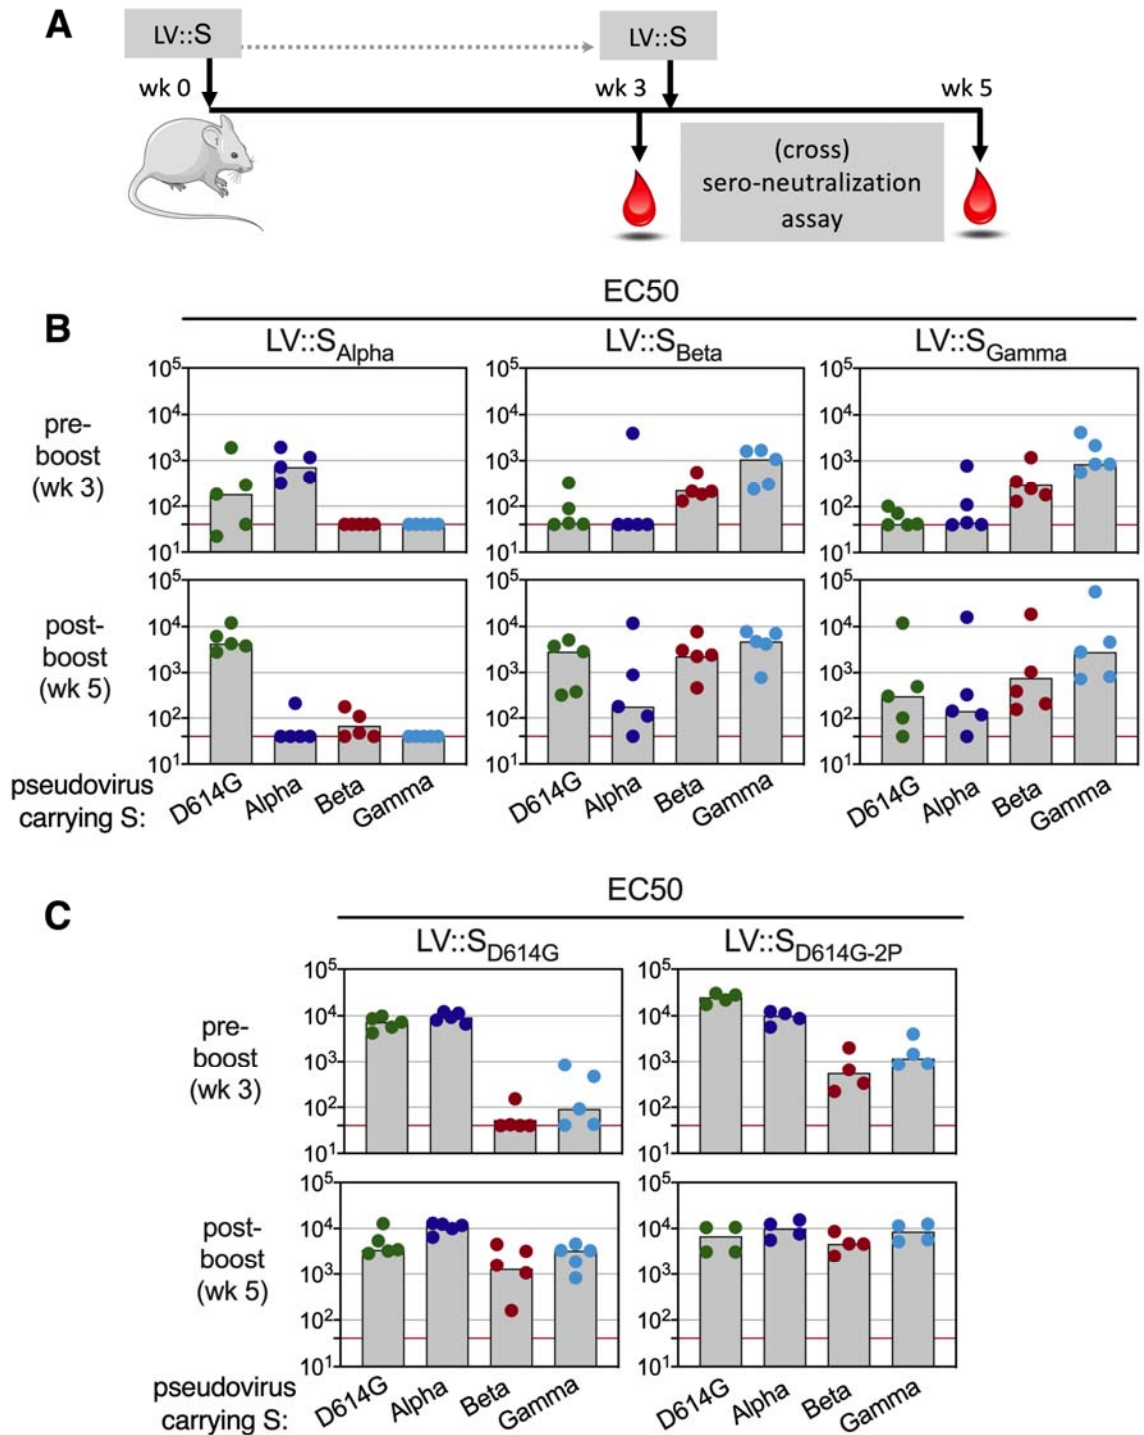

497

498 **Figure 1. Down-selection of a S<sub>CoV-2</sub> variant with the highest potential to induce cross**  
 499 **sero-neutralizing antibodies.** (A) Timeline of prime-boost vaccination with LV::S<sub>Alpha</sub>, LV::S<sub>Beta</sub> or  
 500 LV::S<sub>Gamma</sub> and (cross) sero-neutralization assays in C57BL/6 mice ( $n = 4\text{-}5/\text{group}$ ). (B) EC50 of  
 501 neutralizing activity of sera from vaccinated mice was evaluated before and after the boost, against  
 502 pseudo-viruses carrying S<sub>CoV-2</sub> from D614G, Alpha, Beta or Gamma variants. (C) EC50 of sera from  
 503 C57BL/6 mice, vaccinated following the regimen detailed in (A) with LV encoding for S<sub>D614G</sub>,  
 504 either WT or carrying the K<sup>986</sup>P - V<sup>987</sup>P substitutions in the S2 domain. EC50 was evaluated before  
 505 and after the boost, as indicated in (B).

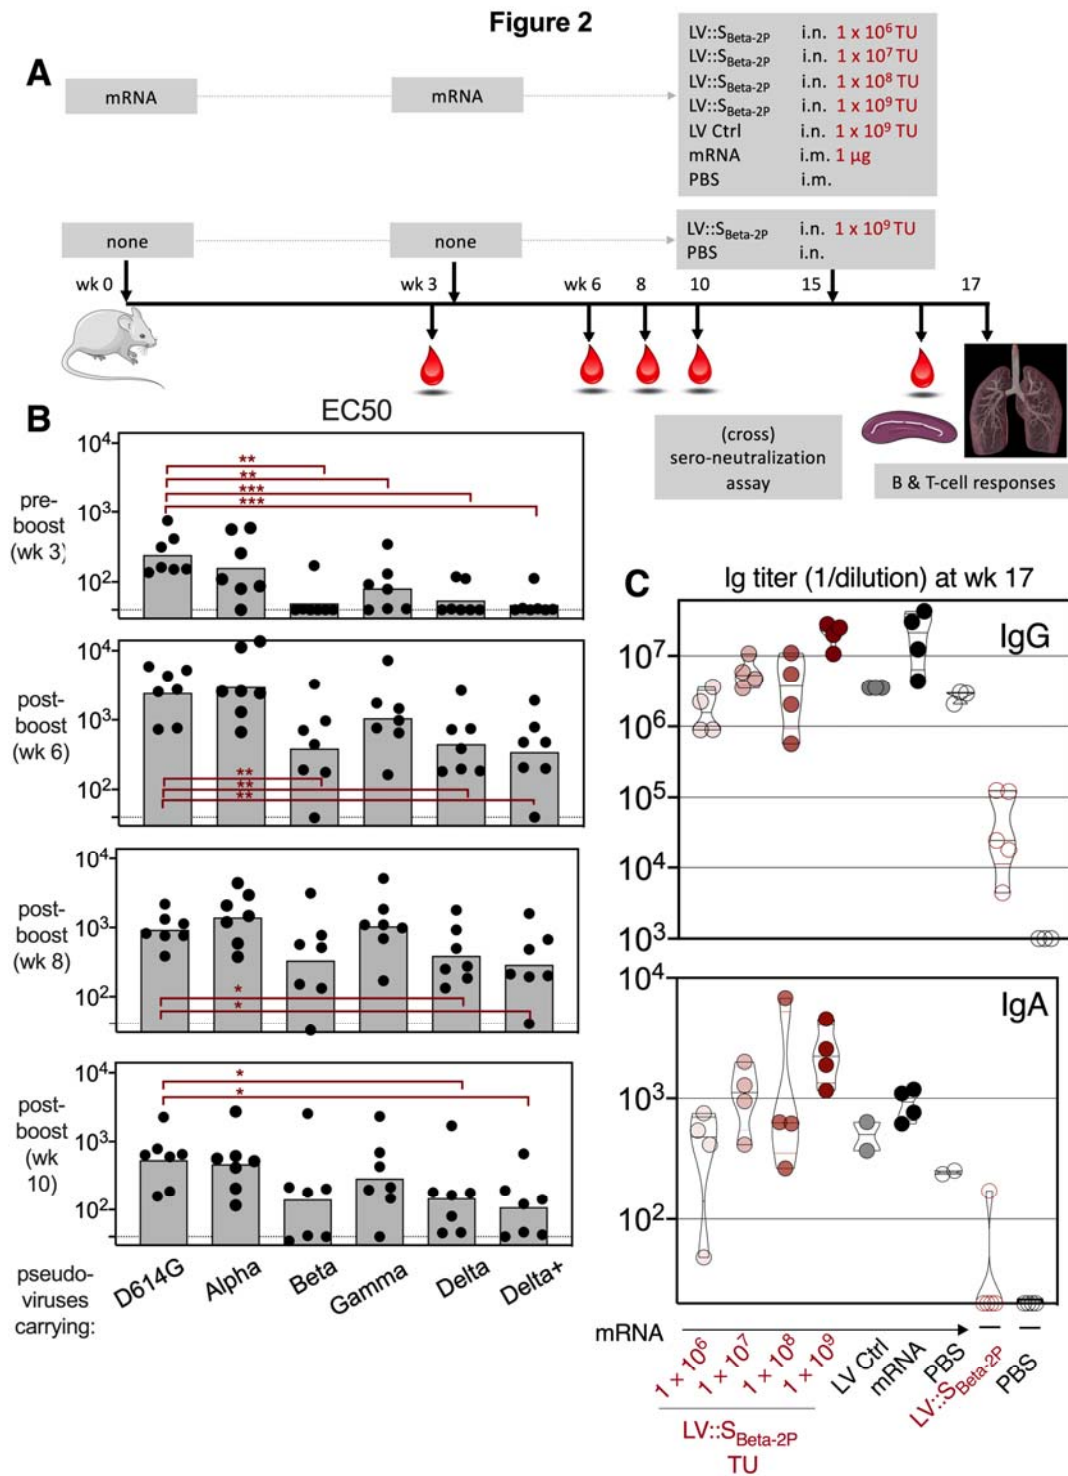

506  
507  
508  
509  
510  
511  
512  
513  
514

**Figure 2. Anti-S<sub>Cov-2</sub> humoral responses in mRNA-vaccinated mice which were further intranasally boosted with LV::S<sub>Beta-2P</sub>** (A) Timeline of mRNA i.m.-i.m. prime-boost vaccination in C57BL/6 mice which were later immunized i.n. by escalating doses of LV::S<sub>Beta-2P</sub> ( $n = 4-5$ /group) and the (cross) sero-neutralization follow-up. (B) Serum EC50 determined at the indicated time points against pseudo-viruses carrying S<sub>Cov-2</sub> from D614G, Alpha, Beta, Gamma, Delta or Delta+ variants. (C) Anti-S<sub>Cov-2</sub> IgG (upper panel) or IgA (lower panel) titers in the sera two weeks after i.n. LV::S<sub>Beta-2P</sub> boost. Statistical significance was determined by Mann-Whitney test (\*=  $p < 0.05$ , \*\*=  $p < 0.01$ , \*\*\*=  $p < 0.001$ ).

**Figure 3**

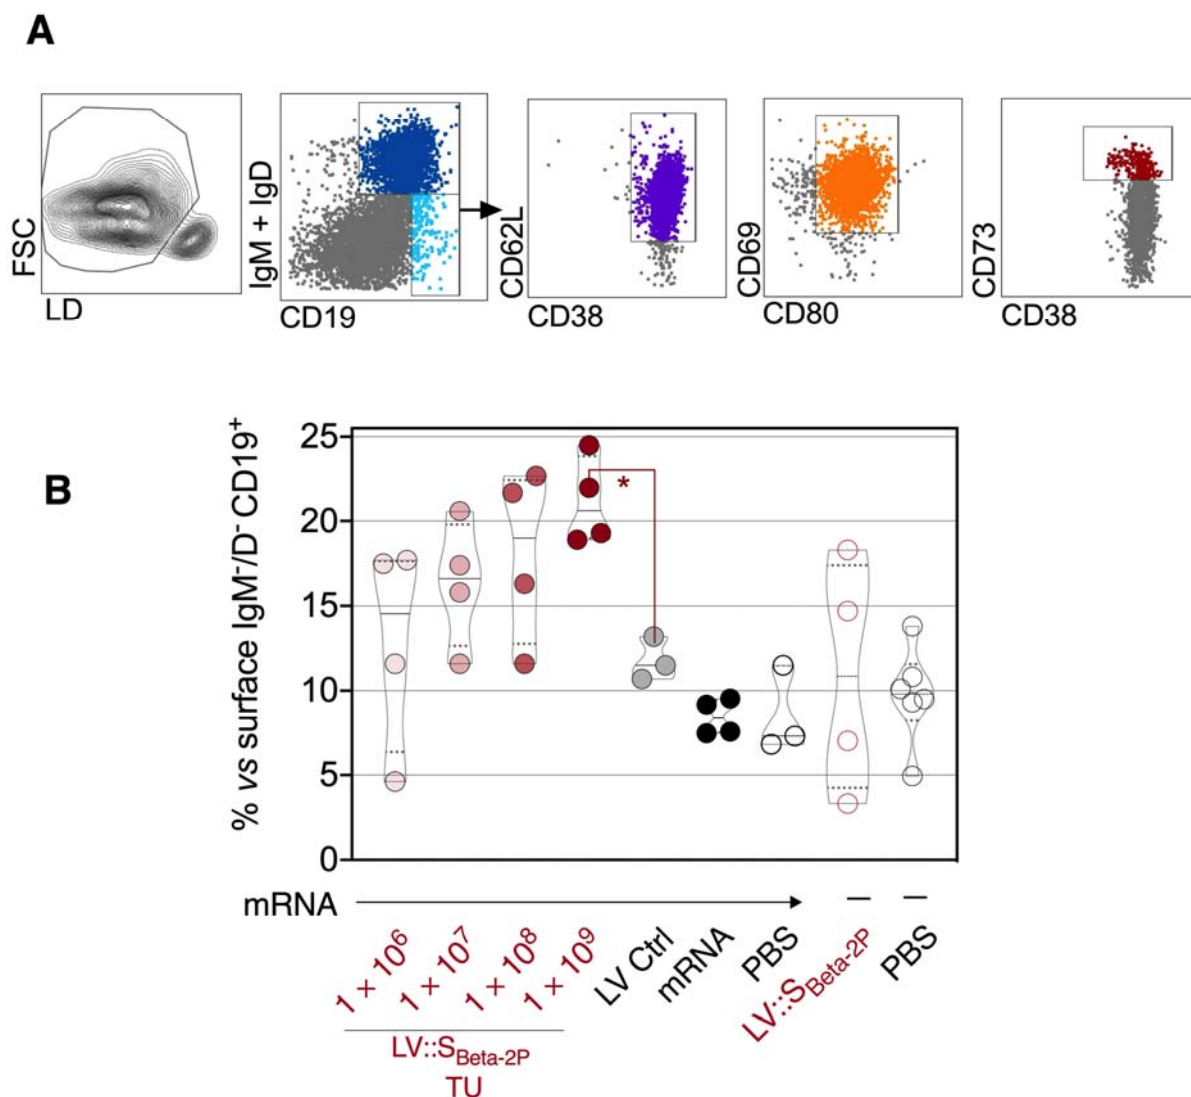

515  
516  
517  
518  
519  
520  
521  
522  
523

**Figure 3. Lung B-cell resident memory subset in mRNA-vaccinated mice which were further intranasally boosted with LV::S<sub>Beta-2P</sub>.** The mice are those detailed in the Figure 2. Mucosal immune cells were studied two weeks after LV::S<sub>Beta-2P</sub> i.n. boost. **(A)** Cytometric gating strategy to detect lung Brm in mRNA-vaccinated mice which were further intranasally boosted with LV::S<sub>Beta-2P</sub>. **(B)** Percentages of these cells among lung CD19<sup>+</sup> surface IgM<sup>-</sup>/IgD<sup>-</sup> B cells in mRNA-vaccinated mice which were further intranasally boosted with LV::S<sub>Beta-2P</sub>. Statistical significance was determined by Mann-Whitney test (\*=  $p < 0.05$ ).

Figure 4

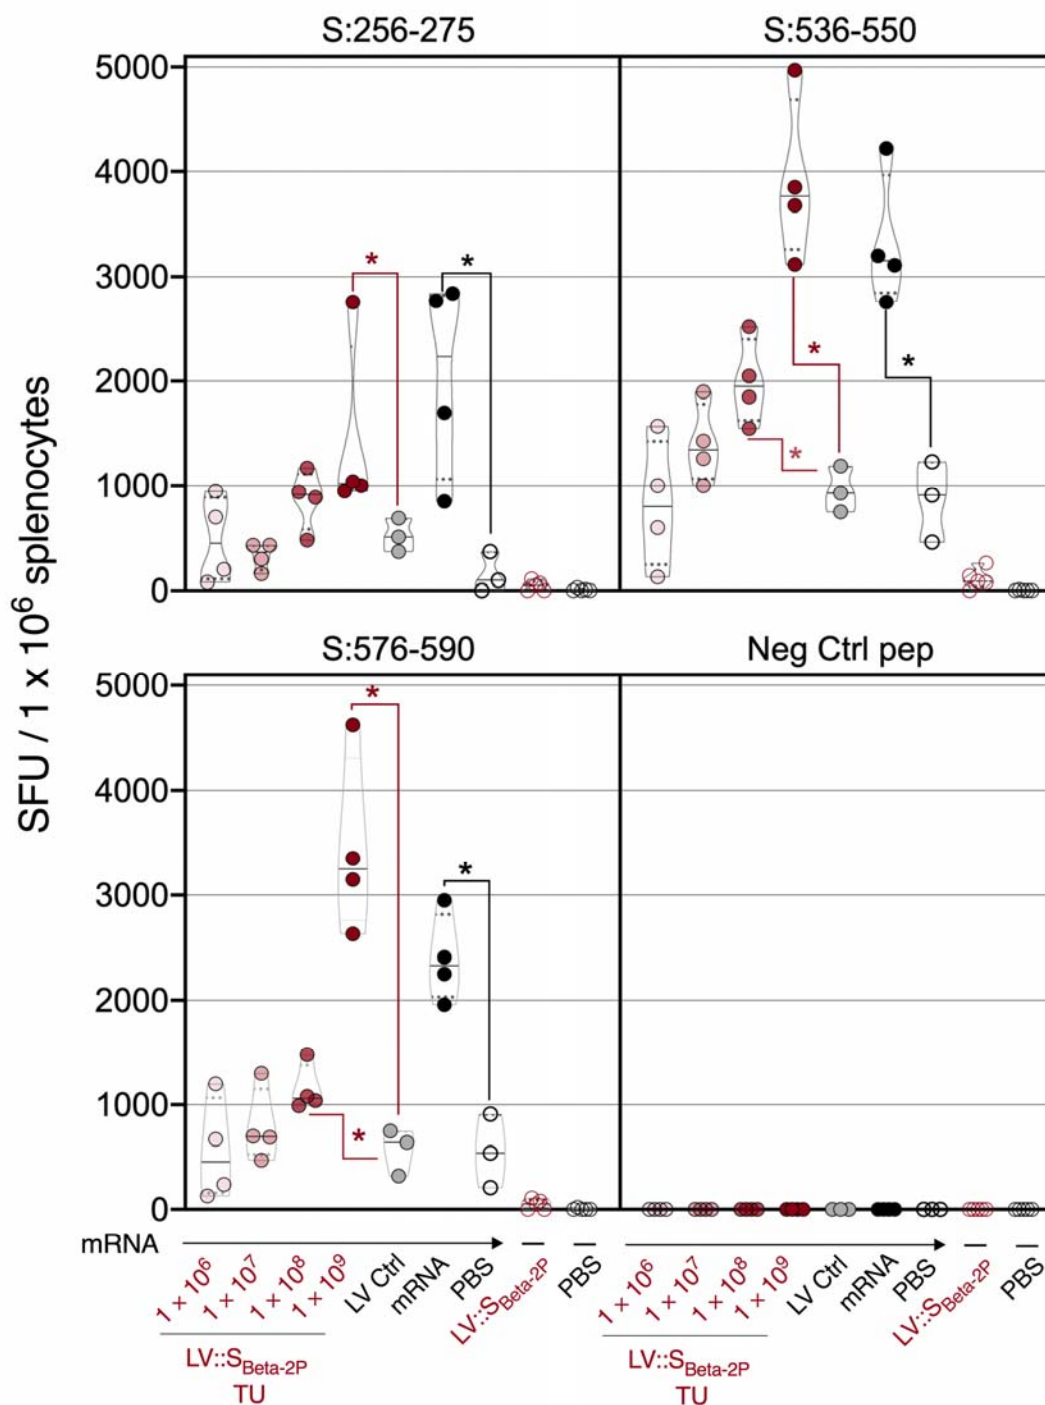

524

525 **Figure 4. Systemic CD8<sup>+</sup> T-cell responses to S<sub>CoV-2</sub> in mRNA-vaccinated mice which were**  
 526 **further intranasally boosted with LV::S<sub>Beta-2P</sub>.** The mice are those detailed in the Figure 2. T-  
 527 splenocyte responses were evaluated two weeks after LV::S<sub>Beta-2P</sub> i.n. boost by IFN- $\gamma$  ELISPOT  
 528 after stimulation with S:256-275, S:536-550 or S:576-590 synthetic 15-mer peptides encompassing  
 529 S<sub>CoV-2</sub> MHC-I-restricted epitopes. Statistical significance was evaluated by Mann-Whitney test (\*=  $p$   
 530 < 0.05).  
 531

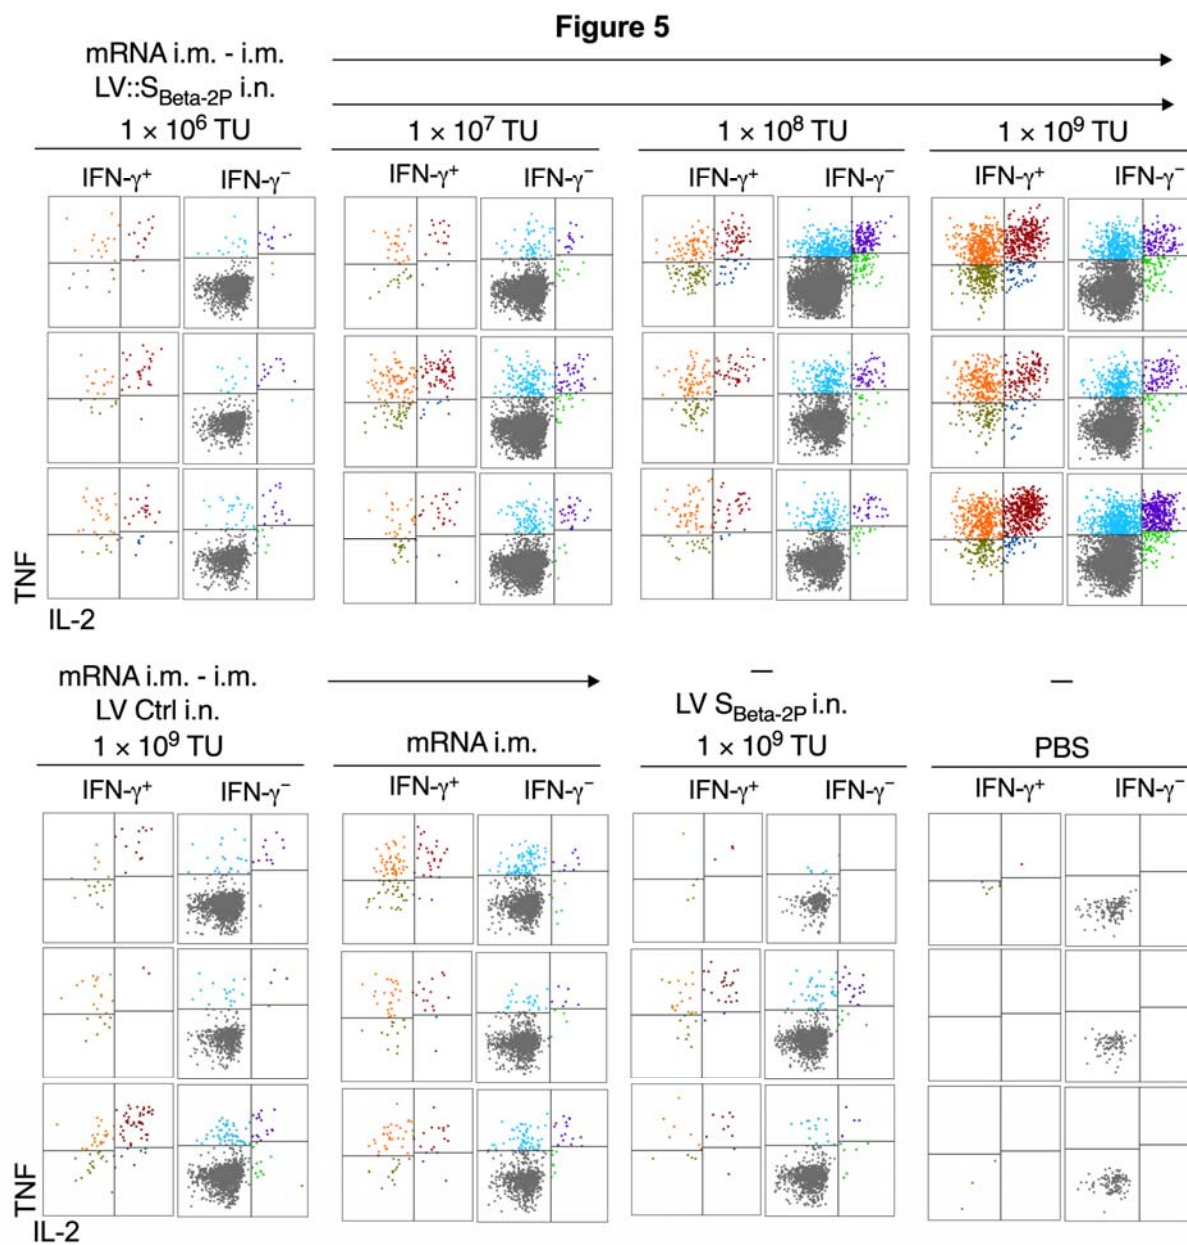

532

533

534

535

536

537

538

**Figure 5. Mucosal CD8<sup>+</sup> T-cell responses to S<sub>CoV-2</sub> in mRNA-vaccinated mice which were further intranasally boosted with LV::S<sub>Beta-2P</sub>.** The mice are those detailed in the Figure 2. (A) Representative IFN-γ response by lung CD8<sup>+</sup> T cells detected by intracellular cytokine staining after in vitro stimulation with a pool of S:256-275, S:536-550 and S:576-590 peptides. Cells are gated on alive CD45<sup>+</sup> CD8<sup>+</sup> T cells.

Figure 6

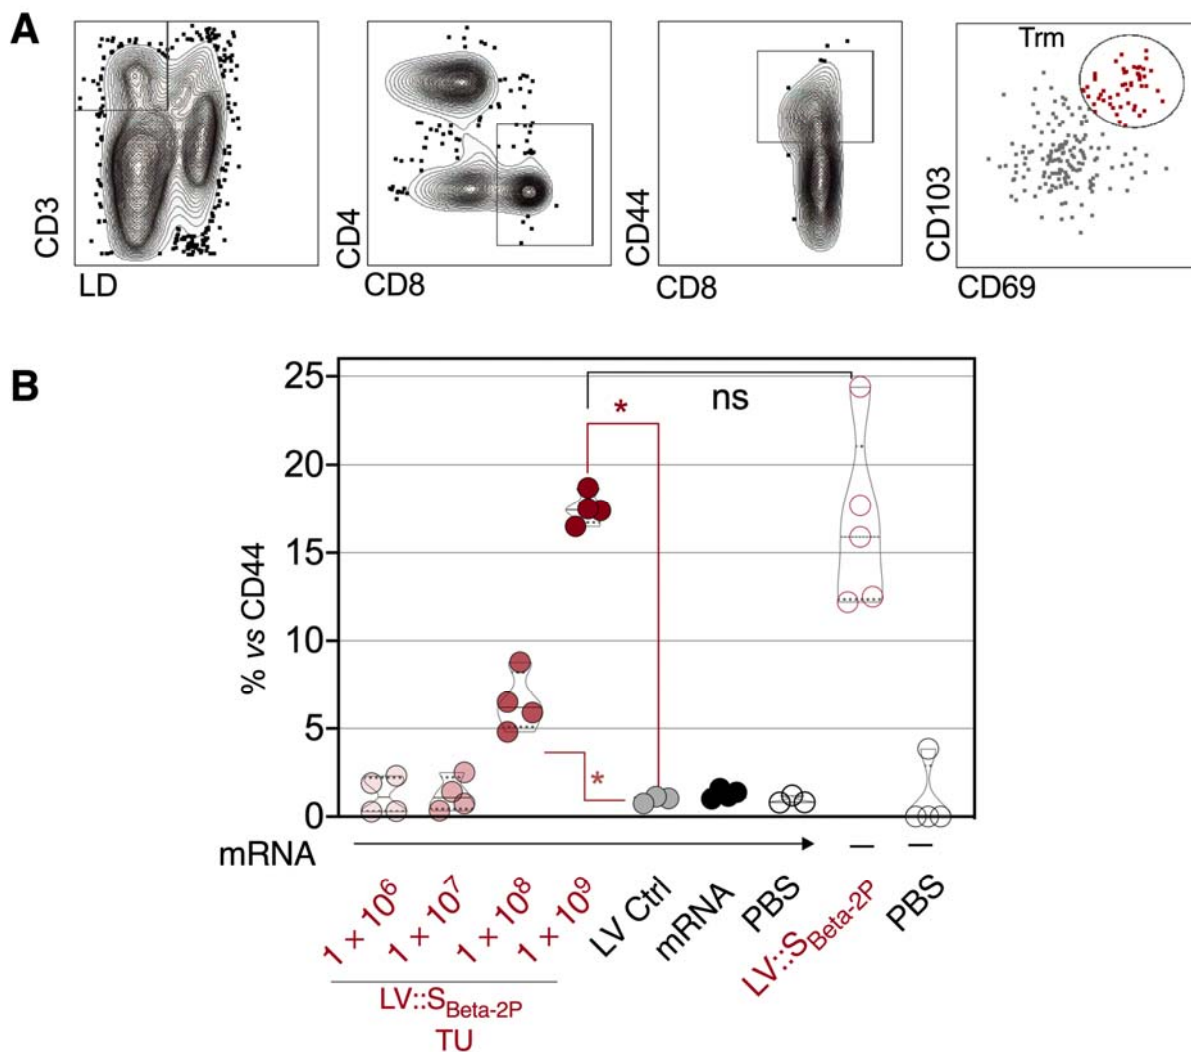

539

540 **Figure 6. Lung T resident memory subset in mRNA-vaccinated mice which were further**  
541 **intranasally boosted with LV::S<sub>Beta-2P</sub>.** The mice are those detailed in the Figure 2. Mucosal  
542 immune cells were studied two weeks after LV::S<sub>Beta-2P</sub> i.n. boost. (A) Cytometric gating strategy to  
543 detect lung CD8<sup>+</sup> T resident memory (CD44<sup>+</sup>CD69<sup>+</sup>CD103<sup>+</sup>), and (B) percentages of this subset  
544 among CD8<sup>+</sup> CD44<sup>+</sup> T-cells in mRNA-vaccinated mice which were further intranasally boosted  
545 with LV::S<sub>Beta-2P</sub>. Statistical significance was evaluated by Mann-Whitney test (\*= *p* < 0.05).

546

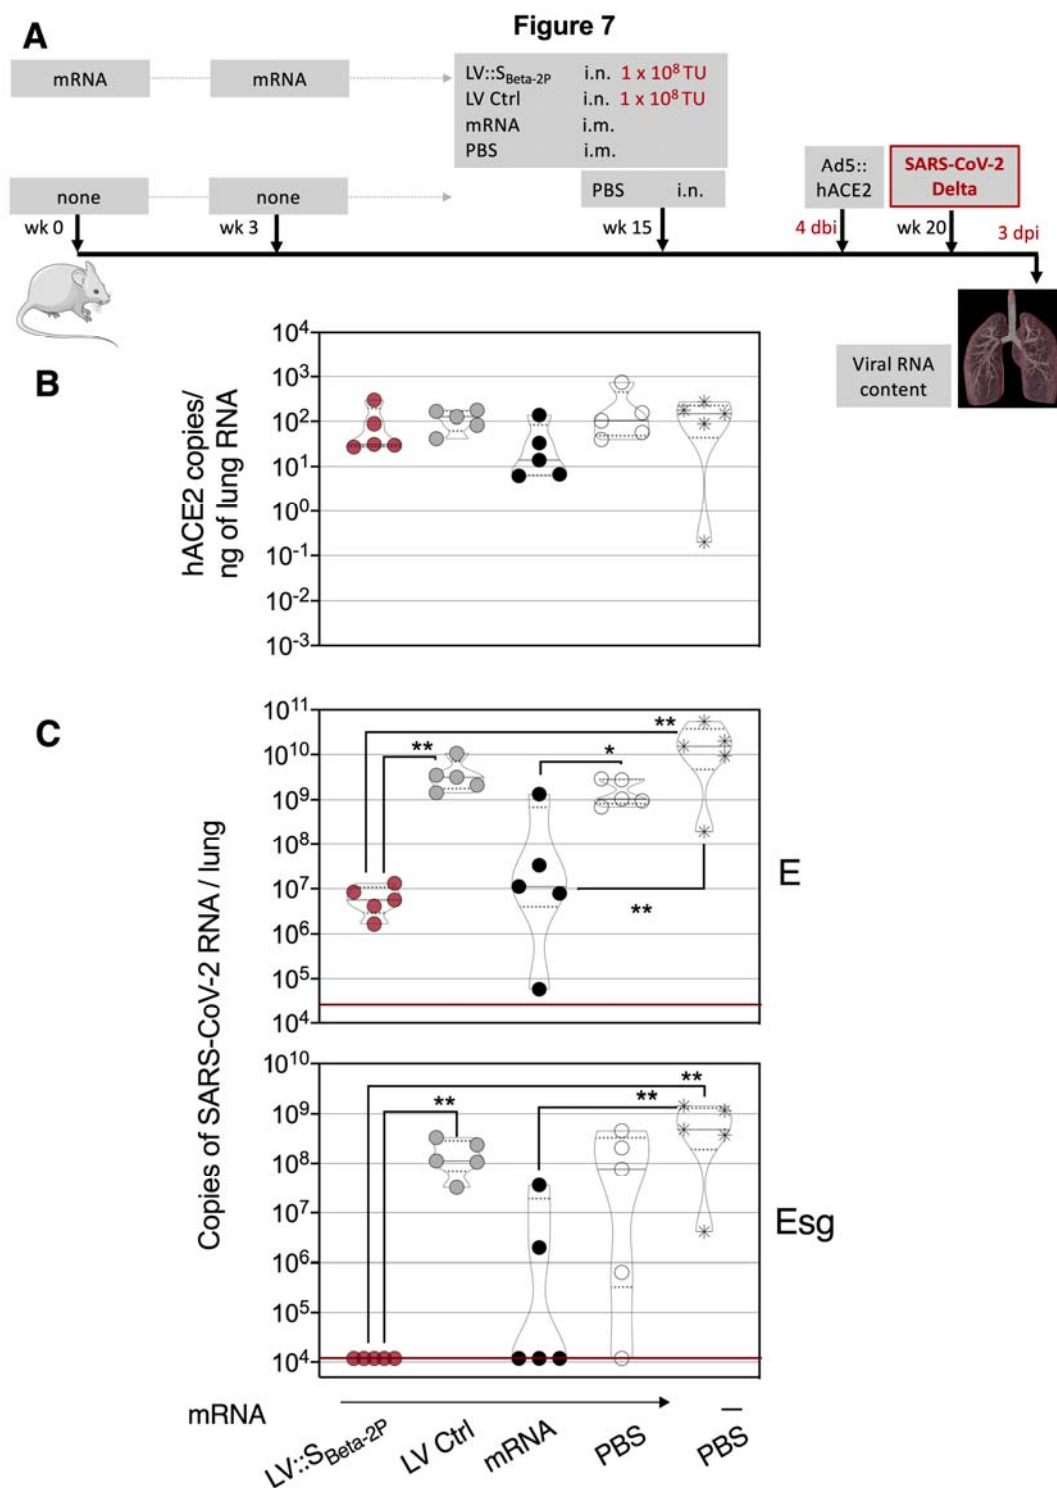

547

548 **Figure 7. Full protective capacity of LV::SBeta-2P i.n. boost against Delta variant in initially**  
 549 **mRNA-primed and boosted mice. (A)** Timeline of mRNA i.m.-i.m. prime-boost vaccination in  
 550 C57BL/6 mice which were later immunized i.n. with  $1 \times 10^8$  TU/mouse of LV::SBeta-2P ( $n = 4$ -  
 551 5/group), pre-treated i.n. with Ad5::hACE-2 4 days before i.n. challenge with  $0.3 \times 10^5$  TCID<sub>50</sub> of  
 552 SARS-CoV-2 Delta variant. **(B)** Comparative quantification of hACE-2 mRNA in the lungs of  
 553 Ad5::hACE-2 pre-treated mice at 3 dpi. **(C)** Lung viral RNA contents, evaluated by conventional E-  
 554 specific (top) or sub-genomic Esg-specific (bottom) qRT-PCR at 3 dpi. Red lines indicate the  
 555 detection limits. Statistical significance was evaluated by Mann-Whitney test (\*=  $p < 0.05$ , \*\*=  $p <$   
 556 0.01).
